# Supplementary material
Source: publisher site journal article supplement (https://www.spandidos-publications.com/1965/downloadSupplementary)
Supplement: Supplementary file 1 [file downloadSupplementary]

Table SI. Clinical characteristics of the patients. CGGA, Chinese Glioma Genome Atlas.

| Sampe_ID  | Age, years | Sex    |
|-----------|------------|--------|
| CGGA_1283 | 18         | Male   |
| CGGA_1285 | 58         | Female |
| CGGA_1752 | 32         | Female |
| CGGA_272  | 51         | Male   |
| CGGA_1324 | 42         | Male   |
| CGGA_D63  | 25         | Male   |
| CGGA_773  | 50         | Female |
| CGGA_1346 | 58         | Female |
| CGGA_1370 | 44         | Male   |
| CGGA_1099 | 8          | Male   |
| CGGA_1393 | 42         | Male   |
| CGGA_1175 | 36         | Female |
| CGGA_1136 | 39         | Female |
| CGGA_374  | 38         | Male   |
| CGGA_D34  | 45         | Male   |
| CGGA_899  | 46         | Male   |
| CGGA_1170 | 26         | Male   |
| CGGA_1751 | 31         | Male   |
| CGGA_1733 | 36         | Male   |
| CGGA_1665 | 39         | Male   |
| CGGA_1734 | 42         | Male   |
| CGGA_1188 | 30         | Female |
| CGGA_1218 | 53         | Male   |
| CGGA_1271 | 17         | Male   |
| CGGA_D59  | 30         | Female |
| CGGA_1227 | 46         | Female |
| CGGA_1105 | 29         | Male   |
| CGGA_1197 | 44         | Male   |
| CGGA_822  | 46         | Male   |
| CGGA_1460 | 51         | Male   |
| CGGA_1450 | 37         | Male   |
| CGGA_1412 | 49         | Female |
| CGGA_P2   | 38         | Male   |
| CGGA_1375 | 50         | Female |
| CGGA_632  | 30         | Male   |

CGGA, Chinese Glioma Genome Atlas.
